# Supplementary material
Source: PubMed Central journal article supplement (PMC7886622)
Supplement: NIHMS1634830-supplement-Supplemental_Information_for_Drew_et_al_.pdf [file NIHMS1634830-supplement-Supplemental_Information_for_Drew_et_al_.pdf]

**Supplemental data for**

**Ultra-slow oscillations in fMRI and resting-state connectivity: Neuronal and vascular contributions and technical confounds**

## Supplemental Text Box 1 - Relation of $R^2$ to $|\tilde{C}(f)|$

Consider a model that predicts a dependent variable from an independent variable. The goodness of fit of a model is usually described by a single parameter,  $R^2$ , which measures the portion of the variance in dependent variable that is predictable from the independent variable. For concreteness, let the dependent variable be the hemodynamic signal, denoted  $H_i(t)$ , and the independent variable be the neurological signal, denoted  $N_i(t)$ . The index  $i$  denotes the trial or epoch. Here we relate  $R^2$  to the spectral coherence,  $\tilde{C}(f)$ , a common measure in signal analysis that reports the tendency of signals track each other within a frequency band centered at frequency  $f$ .

We consider a linear model for the filter  $F(t)$  that transforms the neurological signal into a hemodynamic signal. The estimated hemodynamic signal is denoted  $\hat{H}_i(t)$  and is given by

$$\hat{H}_i(t) = \int_0^t dx F(x) N_i(t-x).$$

In the frequency domain, standard arguments lead to

$$\tilde{F}(f) = \frac{\langle \tilde{N}(f) \tilde{H}^*(f) \rangle}{\langle |\tilde{N}(f)|^2 \rangle}$$

where  $\langle \dots \rangle$  refers to averaging over all trials and spectral estimates and  $\tilde{N}_i(f)$  and  $\tilde{H}_i(f)$  are the Fourier transform of the neurological and hemodynamic signals, respectively. The filter  $F(t)$  is used to estimate  $\hat{H}_i(t)$  in  $R^2$ , i.e.,

$$R^2 \equiv 1 - \frac{\int dt \langle (H(t) - \hat{H}(t))^2 \rangle}{\int dt \langle (H(t) - \langle H \rangle)^2 \rangle}.$$

This can be rewritten with the use of Parseval's theorem as

$$R^2 = 1 - \frac{\int df \langle |\tilde{H}(f) - \hat{\tilde{H}}(f)|^2 \rangle}{\int df \langle |\tilde{H}(f)|^2 \rangle} = \dots = \frac{\int df |\tilde{C}(f)|^2 \langle |\tilde{H}(f)|^2 \rangle}{\int df \langle |\tilde{H}(f)|^2 \rangle}.$$

We see that  $R^2$  is monotonic with respect to the integral of the squared coherence,  $|\tilde{C}(f)|^2$ , weighted by the power in the hemodynamic response. To the extent that  $R^2$  is calculated for a band-limited signal centered at  $f_0$  and extending over a frequency range of relatively constant power in  $H(t)$ , the weighting is constant and  $R^2 \approx |\tilde{C}(f_0)|^2$ .

### Supplemental Table 1.

#### Variance explained between $\gamma$ -band power and hemodynamic changes.

| Species | Correlated vascular quantity versus LFP | Neuronal-hemodynamic variance explained ( $R^2$ ) | Reference                  |
|---------|-----------------------------------------|---------------------------------------------------|----------------------------|
| Macaque | BOLD fMRI                               | ~ 0.1                                             | (Shmuel and Leopold, 2008) |
| Macaque | CBV fMRI (w/Mion)                       | ~ 0.1                                             | (Schölvinck et al., 2010)  |
| Mice    | Optical "BOLD"                          | ~ 0.5*                                            | (Ma et al., 2016)          |
| Mice    | Optical CBV                             | ~ 0.1 - 0.2**                                     | (Winder et al., 2017)      |
| Mice    | Arteriole diameter                      | ~ 0.3*                                            | (Mateo et al., 2017)       |

\* $R^2$  taken as  $|C(0.1 \text{ Hz})|^2$ ; valid over a frequency range of relatively constant power in the hemodynamic transfer function. see **Supplemental Text Box 1**.

\*\* Periods without movement
